# Supplementary material
Source: publisher figshare collection journal article supplement (https://tandf.figshare.com/articles/dataset/_/9616355)
Supplement: Supplementary file 1 [file 2]

Archive with 2 entries (2 files):
- uasa_a_1654874_sm5612.docx
- uasa_a_1654874_sm5610.pdf
